# Supplementary material for: Genome-wide identification of potato long intergenic noncoding RNAs responsive to Pectobacterium carotovorum subspecies brasiliense infection
Source: PubMed Central journal article supplement (PMC4982125; doi:10.1186/s12864-016-2967-9), 2016-08-11

**A**

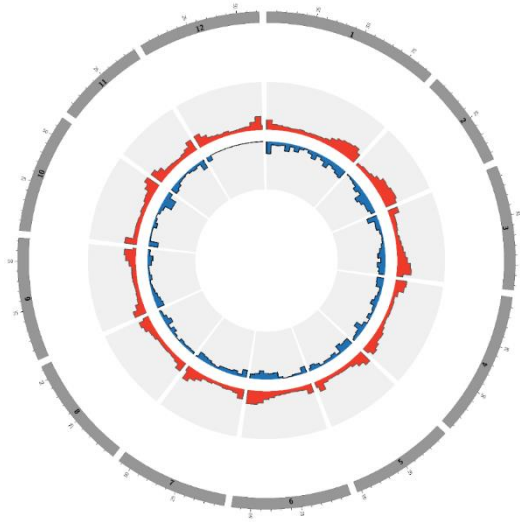

**B**

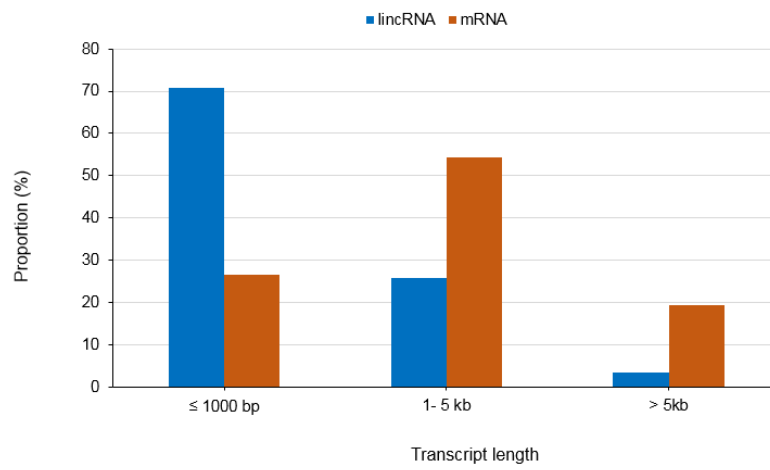

Supplement: 12864_2016_2967_MOESM4_ESM.pdf [file 12864_2016_2967_MOESM4_ESM.pdf]
