# Supplementary material for: Genome-wide identification of potato long intergenic noncoding RNAs responsive to Pectobacterium carotovorum subspecies brasiliense infection
Source: PubMed Central journal article supplement (PMC4982125; doi:10.1186/s12864-016-2967-9), 2016-08-11
Supplement: 12864_2016_2967_MOESM6_ESM.pdf [file 12864_2016_2967_MOESM6_ESM.pdf]

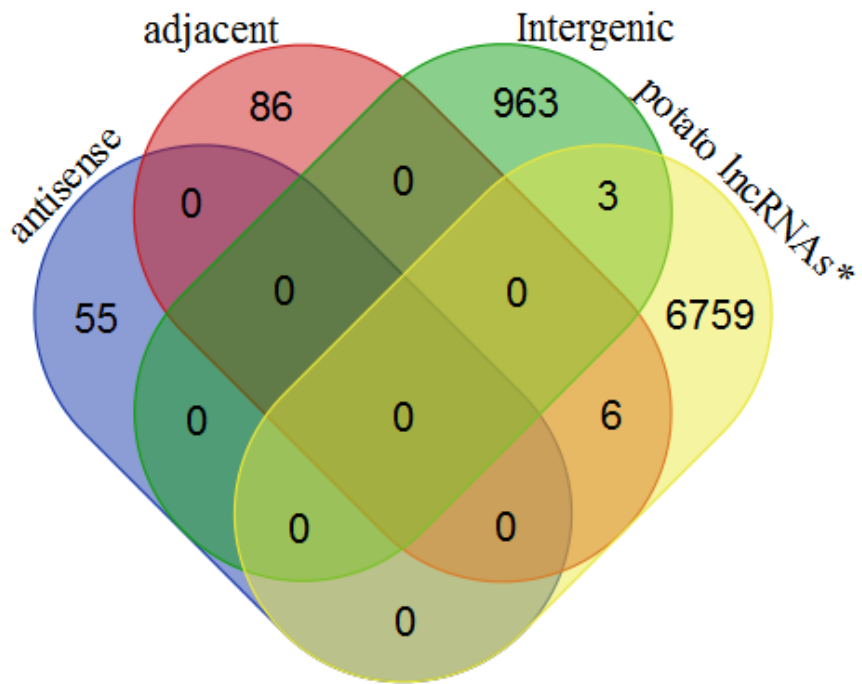

\*Potato lncRNAs obtained from the GreenC database ([http://greenc.sciencedesigners.com/wiki/Main\\_Page](http://greenc.sciencedesigners.com/wiki/Main_Page))
